# Supplementary material for: Expansion of GA Dinucleotide Repeats Increases the Density of CLAMP Binding Sites on the X-Chromosome to Promote Drosophila Dosage Compensation
Source: PubMed Central journal article supplement (PMC4945028; doi:10.1371/journal.pgen.1006120), 2016-07-14

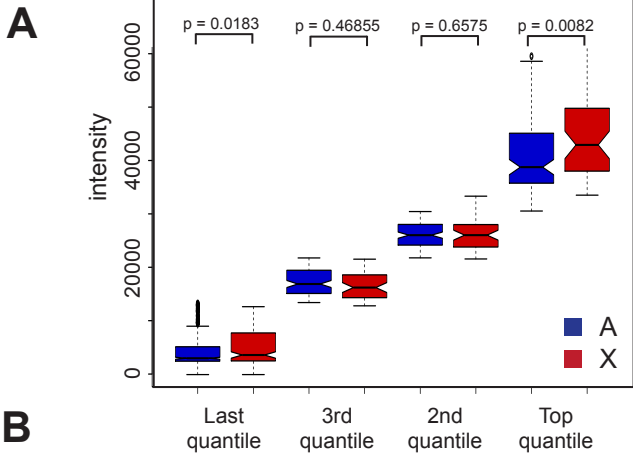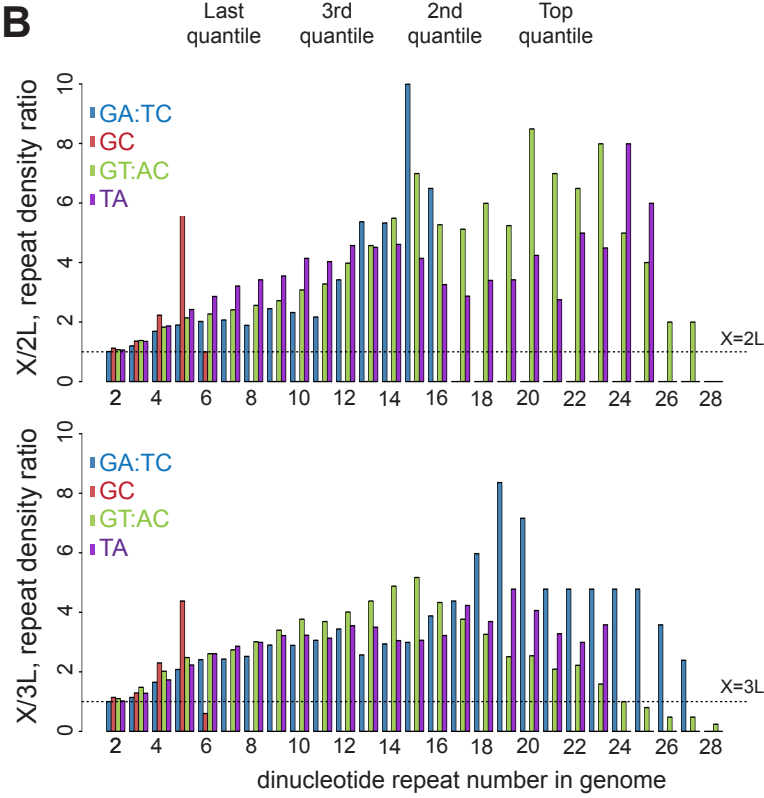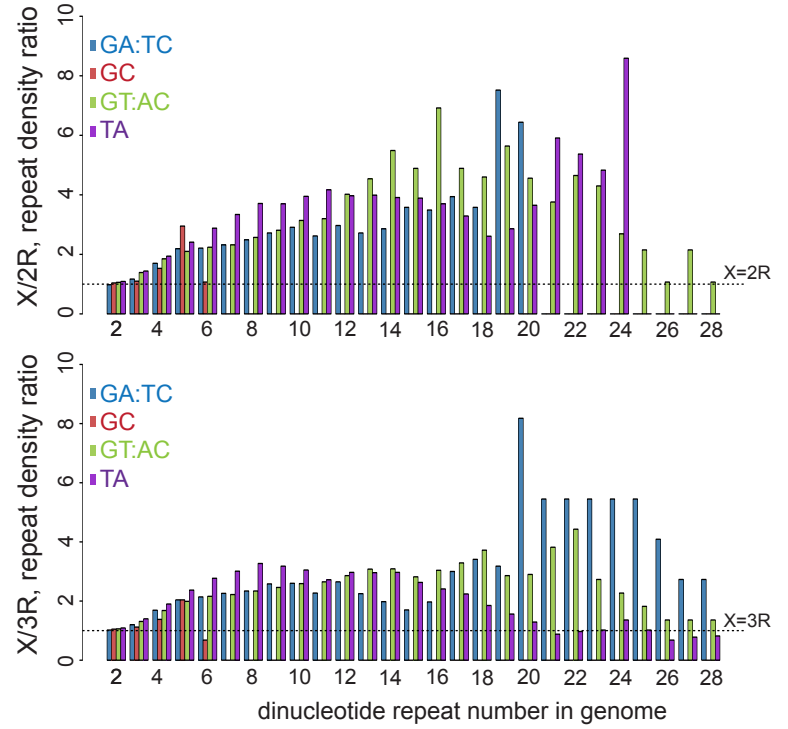

Supplement: pgen.1006120.s005.pdf [file pgen.1006120.s005.pdf]
