# Supplementary material for: Expansion of GA Dinucleotide Repeats Increases the Density of CLAMP Binding Sites on the X-Chromosome to Promote Drosophila Dosage Compensation
Source: PubMed Central journal article supplement (PMC4945028; doi:10.1371/journal.pgen.1006120), 2016-07-14
Supplement: pgen.1006120.s011.pdf [file pgen.1006120.s011.pdf]

*D.miranda* XL/2, repeat density ratio

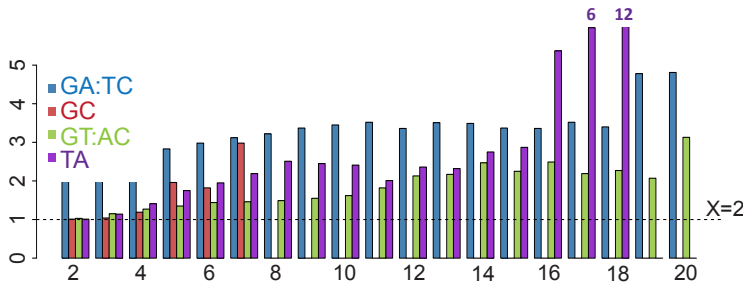

*D.miranda* XL/4, repeat density ratio

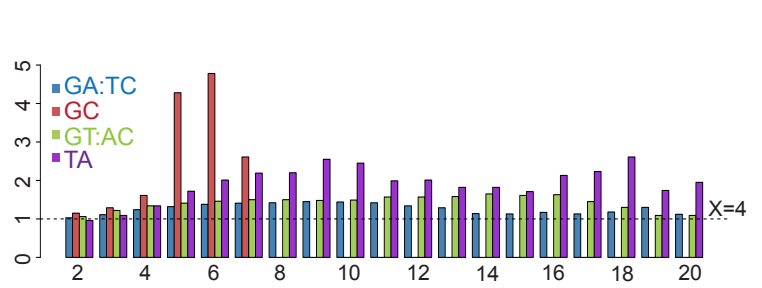

*D.miranda* XL/5, repeat density ratio

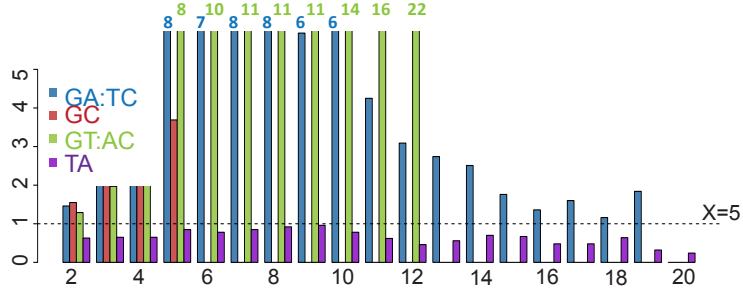

*D.miranda* XR/2, repeat density ratio

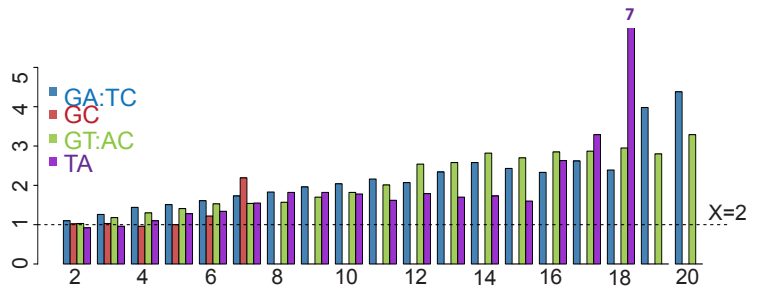

*D.miranda* XR/4, repeat density ratio

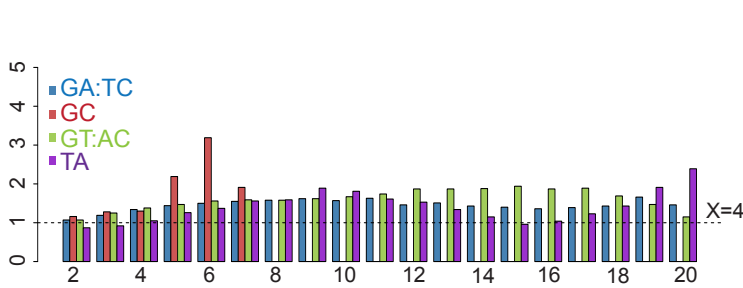

*D.miranda* XR/5, repeat density ratio

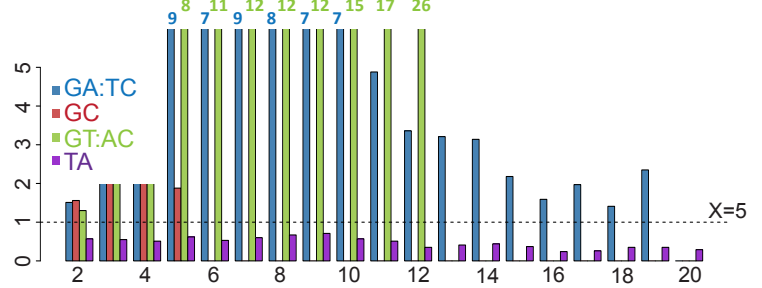

*D.miranda* neoX/2, repeat density ratio

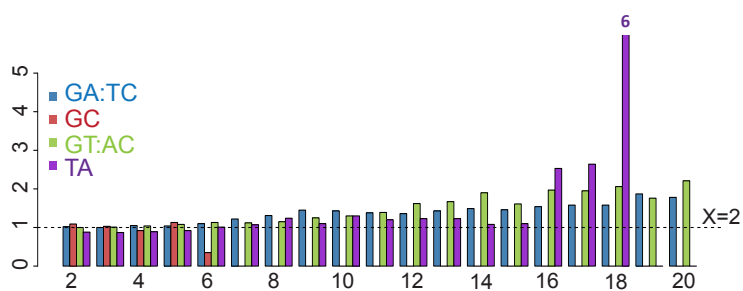

*D.miranda* neoX/4, repeat density ratio

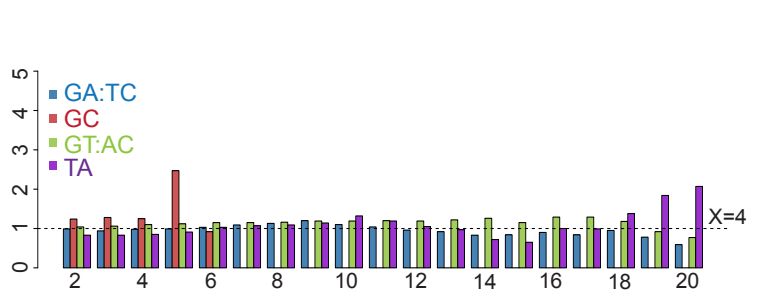

*D.miranda* neoX/5, repeat density ratio

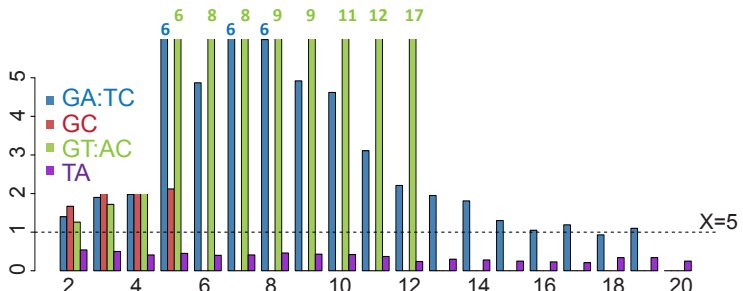

dinucleotide repeat number in genome
