# Supplementary material for: Expansion of GA Dinucleotide Repeats Increases the Density of CLAMP Binding Sites on the X-Chromosome to Promote Drosophila Dosage Compensation
Source: PubMed Central journal article supplement (PMC4945028; doi:10.1371/journal.pgen.1006120), 2016-07-14
Supplement: pgen.1006120.s014.pdf [file pgen.1006120.s014.pdf]

```
Me1_MSL2_CXC 525 CRCGISGSSNTLTTTCRNSRCPCYKSYNSCAGCHCVCC 583
                |.....|      |||||.|:|.|.|.|.|.
Mir_MSL2_CXC 364 -----TPAARR-----CYKSGNTCANCRCFGC 385
```
