# Supplementary material for: Expansion of GA Dinucleotide Repeats Increases the Density of CLAMP Binding Sites on the X-Chromosome to Promote Drosophila Dosage Compensation
Source: PubMed Central journal article supplement (PMC4945028; doi:10.1371/journal.pgen.1006120), 2016-07-14
Supplement: pgen.1006120.s015.pdf [file pgen.1006120.s015.pdf]

**Table S1.** The PBM probes.

| Probe ID                                                  | # of Probes | # Unique Sequences | # of Replicates | Brief Desc.                                                 |
|-----------------------------------------------------------|-------------|--------------------|-----------------|-------------------------------------------------------------|
| <b>(A) PROBES EXAMINING SINGLE pMRE/MRE SITES</b>         |             |                    |                 |                                                             |
| mreP_gen_nX_oY_rZ                                         | 27216       | 3402               | 4               | ChIP, +MRE/+pMRE, Genomic flanks                            |
| mreN_gen_nX_oY_rZ                                         | 10168       | 1271               | 4               | ChIP, -MRE/+pMRE, Genomic flanks                            |
| negP_gen_nX_oX_rX                                         | 1664        | 208                | 4               | (Neg Control) No ChIP, +MRE/+pMRE, Genomic flanks           |
| negN_gen_nX_oX_rX                                         | 6576        | 822                | 4               | (Neg Control) No ChIP, -MRE/+pMRE, Genomic flanks           |
| cons_nX_oY_rZ                                             | 2816        | 352                | 4               | Aggregate probeset of the 8-11bp pMREs with Constant Flanks |
| <b>(B) PROBES TILING ACROSS DIFFERENT GENOMIC REGIONS</b> |             |                    |                 |                                                             |
| rox1_n0_pX_oX_rX                                          | 1648        | 206                | 4               | Wide Tiling (1000bp windows), High Affinity Region          |
| 5c2_n0_pX_oX_rX                                           | 1632        | 204                | 4               | Wide Tiling (1000bp windows), High Affinity Region          |
| rox2_n0_pX_oX_rX                                          | 1648        | 206                | 4               | Wide Tiling (1000bp windows), High Affinity Region          |
| 11d1_n0_pX_oX_rX                                          | 1648        | 206                | 4               | Wide Tiling (1000bp windows), High Affinity Region          |
| 15a8_n0_pX_oX_rX                                          | 1648        | 206                | 4               | Wide Tiling (1000bp windows), High Affinity Region          |
| til_nochp_nX_pX_oX_rX                                     | 16456       | 2057               | 4               | Wide Tiling (1000bp windows), No CLAMP Chip, +pMRE          |
| til_chpmre_nX_pX_oX_rX                                    | 19568       | 2446               | 4               | Wide Tiling (1000bp windows) CLAMP Chip, +MRE/pMRE          |
| til_chpno_nX_pX_oX_rX                                     | 16424       | 2053               | 4               | Wide Tiling (1000bp windows) CLAMP Chip, -MRE/-pMRE         |
| ntil_nochp_nX_pX_oX_rX                                    | 14104       | 1763               | 4               | Narrow Tiling (100bp windows), CLAMP Chip, -MRE/-pMRE       |
| ntil_chp_nX_pX_oX_rX                                      | 33720       | 4215               | 4               | Narrow Tiling (100bp windows), CLAMP Chip, +MRE/+pMRE       |
| <b>(C) CONTROL PROBES</b>                                 |             |                    |                 |                                                             |
| pX_pX_nX_oX_rX                                            | 540         | 90                 | 6               | Pairs of Sites                                              |
| mre1_PO_pX_wX_oX_rX                                       | 336         | 28                 | 6               | Position Dependence (PWM1:AGAGAGAGA)                        |
| mre2_PO_pX_wX_oX_rX                                       | 348         | 29                 | 6               | Position Dependence (PWM2:TAGAAGAG)                         |
| extra_nX_oX_rX                                            | 570         | 6                  | 48              |                                                             |
