# Supplementary material for: Expansion of GA Dinucleotide Repeats Increases the Density of CLAMP Binding Sites on the X-Chromosome to Promote Drosophila Dosage Compensation
Source: PubMed Central journal article supplement (PMC4945028; doi:10.1371/journal.pgen.1006120), 2016-07-14
Supplement: pgen.1006120.s016.pdf [file pgen.1006120.s016.pdf]

**Table S2.** Kolmogorov–Smirnov test was applied to the PBM intensities of probes.

|                       | ChIP+<br>MRE+ | ChIP+<br>MRE- | ChIP-<br>MRE+ | ChIP-<br>MRE- | PBM+<br>ChIP+<br>MRE+ | PBM+<br>ChIP+<br>MRE- | PBM+<br>ChIP+<br>MRE+ | PBM+<br>ChIP+<br>MRE- |
|-----------------------|---------------|---------------|---------------|---------------|-----------------------|-----------------------|-----------------------|-----------------------|
| ChIP+<br>MRE+         |               |               |               |               |                       |                       |                       |                       |
| ChIP+<br>MRE-         | < 2.2e-16     |               |               |               |                       |                       |                       |                       |
| ChIP-<br>MRE+         | 2.51e-13      | < 2.2e-16     |               |               |                       |                       |                       |                       |
| ChIP-<br>MRE-         | < 2.2e-16     | < 2.2e-16     | < 2.2e-16     |               |                       |                       |                       |                       |
| PBM+<br>ChIP+<br>MRE+ | < 2.2e-16     | < 2.2e-16     | < 2.2e-16     | < 2.2e-16     |                       |                       |                       |                       |
| PBM+<br>ChIP+<br>MRE- | 1.29e-06      | < 2.2e-16     | 8.31e-10      | < 2.2e-16     | 1.92e-13              |                       |                       |                       |
| PBM-<br>ChIP-<br>MRE+ | < 2.2e-16     | 2.87e-12      | 1.73e-10      | < 2.2e-16     | < 2.2e-16             | < 2.2e-16             |                       |                       |
| PBM-<br>ChIP-<br>MRE- | < 2.2e-16     | < 2.2e-16     | < 2.2e-16     | 1             | < 2.2e-16             | < 2.2e-16             | < 2.2e-16             |                       |

Categories tested include ‘ChIP+MRE+’, ‘ChIP+MRE-’, ‘ChIP-MRE+’, ‘ChIP-MRE-’, ‘PBM+ChIP+MRE+’, ‘PBM+ChIP+MRE-’, ‘PBM-ChIP-MRE+’, and ‘PBM-ChIP-MRE-’, where ‘ChIP+’ indicates CLAMP binding *in vivo*, ‘MRE+’ indicates the sequence is with MSL recognition element and ‘PBM+’ indicates CLAMP binding *in vitro*. Values show the p-values.
