# Supplementary material for: Expansion of GA Dinucleotide Repeats Increases the Density of CLAMP Binding Sites on the X-Chromosome to Promote Drosophila Dosage Compensation
Source: PubMed Central journal article supplement (PMC4945028; doi:10.1371/journal.pgen.1006120), 2016-07-14
Supplement: pgen.1006120.s017.pdf [file pgen.1006120.s017.pdf]

**Table S3.** Kolmogorov–Smirnov test was applied to the enrichments on the sequences with different similarities to the motif.

|                      | $-\log_{10}(p) < 4$ | $-\log_{10}(p): 4-5$ | $-\log_{10}(p): 5-6$ | $-\log_{10}(p) > 6$ |
|----------------------|---------------------|----------------------|----------------------|---------------------|
| $-\log_{10}(p) < 4$  |                     |                      |                      |                     |
| $-\log_{10}(p): 4-5$ | $< 2.2e-16$         |                      |                      |                     |
| $-\log_{10}(p): 5-6$ | $< 2.2e-16$         | $< 2.2e-16$          |                      |                     |
| $-\log_{10}(p) > 6$  | $< 2.2e-16$         | $< 2.2e-16$          | $8.4e-4$             |                     |

Values show the Kolmogorov–Smirnov test p-values. Similarities to the motif were calculated with the FIMO tool, and categories are  $-\log_{10}(p\text{-value})$  is smaller than 4, between 4 and 5, between 5 and 6, and larger than 6.
