# Supplementary material for: Expansion of GA Dinucleotide Repeats Increases the Density of CLAMP Binding Sites on the X-Chromosome to Promote Drosophila Dosage Compensation
Source: PubMed Central journal article supplement (PMC4945028; doi:10.1371/journal.pgen.1006120), 2016-07-14
Supplement: pgen.1006120.s018.pdf [file pgen.1006120.s018.pdf]

**Table S4.** Euclidean distance between motifs

| Comparison                     | 8-bp core | Flanking |
|--------------------------------|-----------|----------|
| PBM+ChIP+MRE+ vs PBM+ChIP+MRE- | 0.080     | 0.212    |
| PBM+ChIP+MRE+ vs PBM-ChIP-MRE+ | 0.091     | 0.117    |
| PBM+ChIP+MRE+ vs PBM-ChIP-MRE- | 0.268     | 0.264    |
| PBM+ChIP+MRE- vs PBM-ChIP-MRE+ | 0.119     | 0.196    |
| PBM+ChIP+MRE- vs PBM-ChIP-MRE- | 0.235     | 0.200    |
| PBM-ChIP-MRE+ vs PBM-ChIP-MRE- | 0.247     | 0.210    |

The Euclidean distance between all classes of motifs is shown. The Euclidean distance between the 8-bp cores and the flanking sequences are shown separately.
