# Supplementary material for: Expansion of GA Dinucleotide Repeats Increases the Density of CLAMP Binding Sites on the X-Chromosome to Promote Drosophila Dosage Compensation
Source: PubMed Central journal article supplement (PMC4945028; doi:10.1371/journal.pgen.1006120), 2016-07-14
Supplement: pgen.1006120.s019.pdf [file pgen.1006120.s019.pdf]

**Table S5.** Kolmogorov-Smirnov test to compare binding to different flanking sequence categories.

| Kolmogorov–Smirnov test (p-values)  | 8bp + matched endogenous flank | 8bp + unmatched endogenous flank | 8bp + unmatched synthetic flank | without 8bp core part | 8bp + matched endogenous flank, 4ZF |
|-------------------------------------|--------------------------------|----------------------------------|---------------------------------|-----------------------|-------------------------------------|
| 8bp + matched endogenous flank      |                                |                                  |                                 |                       |                                     |
| 8bp + unmatched endogenous flank    | < 2.2e-16                      |                                  |                                 |                       |                                     |
| 8bp + unmatched synthetic flank     | < 2.2e-16                      | < 2.2e-16                        |                                 |                       |                                     |
| without 8bp core part               | < 2.2e-16                      | < 2.2e-16                        | 7.14e-11                        |                       |                                     |
| 8bp + matched endogenous flank, 4ZF | < 2.2e-16                      | < 2.2e-16                        | < 2.2e-16                       | < 2.2e-16             |                                     |

Kolmogorov–Smirnov test was applied to the PBM intensities of probes with 8-bp core part and matched endogenous flank, with 8-bp core part and unmatched endogenous flank, with 8-bp core part and unmatched synthetic flank, without 8-bp core part, and with 8-bp core part and matched endogenous flank for 4 zinc finger protein. Values show the p-values.
