# Supplementary material for: Expansion of GA Dinucleotide Repeats Increases the Density of CLAMP Binding Sites on the X-Chromosome to Promote Drosophila Dosage Compensation
Source: PubMed Central journal article supplement (PMC4945028; doi:10.1371/journal.pgen.1006120), 2016-07-14
Supplement: pgen.1006120.s020.pdf [file pgen.1006120.s020.pdf]

**Table S6.** The count of probes that contain each number of GA-repeats.

| GA repeats | # probes |
|------------|----------|
| 1          | 65       |
| 2          | 1404     |
| 3          | 516      |
| 4          | 365      |
| 5          | 161      |
| 6          | 107      |
| 7          | 79       |
| 8          | 46       |
| 9          | 25       |
| 10         | 10       |
| 11+        | 17       |
