# Supplementary material for: Expansion of GA Dinucleotide Repeats Increases the Density of CLAMP Binding Sites on the X-Chromosome to Promote Drosophila Dosage Compensation
Source: PubMed Central journal article supplement (PMC4945028; doi:10.1371/journal.pgen.1006120), 2016-07-14
Supplement: pgen.1006120.s021.pdf [file pgen.1006120.s021.pdf]

**Table S7.** Number of GA-repeats in *D. melanogaster* autosomes (A) and the X-chromosome (X).

|        | A      | X      |
|--------|--------|--------|
| GA*2   | 572439 | 119767 |
| GA*3   | 34825  | 7760   |
| GA*4   | 3703   | 1101   |
| GA*5   | 877    | 330    |
| GA*6   | 465    | 188    |
| GA*7   | 309    | 146    |
| GA*8   | 267    | 99     |
| GA*9   | 147    | 82     |
| GA*10  | 91     | 58     |
| GA*11  | 77     | 28     |
| GA*12+ | 106    | 68     |

Repeats are not overlapping, i.e. the repeats are assigned by the longest length. For the two replicates used in Fig 3D, these numbers are doubled.
