# Supplementary material for: Expansion of GA Dinucleotide Repeats Increases the Density of CLAMP Binding Sites on the X-Chromosome to Promote Drosophila Dosage Compensation
Source: PubMed Central journal article supplement (PMC4945028; doi:10.1371/journal.pgen.1006120), 2016-07-14
Supplement: pgen.1006120.s022.pdf [file pgen.1006120.s022.pdf]

**Table S8.** Number of GA repeats in *D. melanogaster* chromosomes and individual chromosomal arms. Repeats with different lengths may be overlapping.

|              | X      | A      | 2L     | 2R     | 3L     | 3R     | 4    |
|--------------|--------|--------|--------|--------|--------|--------|------|
| <b>GA*2</b>  | 139219 | 649229 | 137531 | 152227 | 166567 | 186201 | 6703 |
| <b>GA*3</b>  | 11273  | 44768  | 9384   | 10376  | 11774  | 12748  | 486  |
| <b>GA*4</b>  | 2552   | 7065   | 1511   | 1610   | 1849   | 2063   | 32   |
| <b>GA*5</b>  | 1191   | 2696   | 627    | 583    | 684    | 797    | 5    |
| <b>GA*6</b>  | 752    | 1590   | 372    | 366    | 373    | 478    | 1    |
| <b>GA*7</b>  | 517    | 1054   | 249    | 239    | 254    | 312    | 0    |
| <b>GA*8</b>  | 352    | 710    | 186    | 152    | 167    | 205    | 0    |
| <b>GA*9</b>  | 248    | 432    | 101    | 98     | 102    | 131    | 0    |
| <b>GA*10</b> | 160    | 278    | 69     | 59     | 66     | 84     | 0    |
| <b>GA*11</b> | 100    | 186    | 46     | 41     | 39     | 60     | 0    |
| <b>GA*12</b> | 72     | 109    | 21     | 26     | 25     | 37     | 0    |
| <b>GA*13</b> | 43     | 71     | 8      | 17     | 20     | 26     | 0    |
| <b>GA*14</b> | 32     | 53     | 6      | 12     | 13     | 22     | 0    |
| <b>GA*15</b> | 20     | 32     | 2      | 6      | 8      | 16     | 0    |
| <b>GA*16</b> | 13     | 19     | 2      | 4      | 4      | 9      | 0    |
| <b>GA*17</b> | 11     | 11     | 0      | 3      | 3      | 5      | 0    |
| <b>GA*18</b> | 10     | 9      | 0      | 3      | 2      | 4      | 0    |
| <b>GA*19</b> | 7      | 5      | 0      | 1      | 1      | 3      | 0    |
| <b>GA*20</b> | 6      | 3      | 0      | 1      | 1      | 1      | 0    |
| <b>GA*21</b> | 4      | 2      | 0      | 0      | 1      | 1      | 0    |
| <b>GA*22</b> | 4      | 2      | 0      | 0      | 1      | 1      | 0    |
| <b>GA*23</b> | 4      | 2      | 0      | 0      | 1      | 1      | 0    |
| <b>GA*24</b> | 4      | 2      | 0      | 0      | 1      | 1      | 0    |
| <b>GA*25</b> | 4      | 2      | 0      | 0      | 1      | 1      | 0    |
| <b>GA*26</b> | 3      | 2      | 0      | 0      | 1      | 1      | 0    |
| <b>GA*27</b> | 2      | 2      | 0      | 0      | 1      | 1      | 0    |
| <b>GA*28</b> | 2      | 1      | 0      | 0      | 0      | 1      | 0    |
