# Supplementary material for: Expansion of GA Dinucleotide Repeats Increases the Density of CLAMP Binding Sites on the X-Chromosome to Promote Drosophila Dosage Compensation
Source: PubMed Central journal article supplement (PMC4945028; doi:10.1371/journal.pgen.1006120), 2016-07-14
Supplement: pgen.1006120.s025.pdf [file pgen.1006120.s025.pdf]

**Table S11.** Numbers of S2 and KC ChIP-seq peaks used in the average distance calculation are given.

|        | 1st neighbor | up to 2nd neighbor | up to 3rd neighbor | up to 4th neighbor |
|--------|--------------|--------------------|--------------------|--------------------|
| S2 CES | 337          | 606                | 864                | 1055               |
| S2 X   | 2704         | 2704               | 2704               | 2704               |
| S2 A   | 11607        | 11607              | 11607              | 11607              |
| Kc CES | 248          | 516                | 788                | 1037               |
| Kc X   | 3220         | 3220               | 3220               | 3220               |
| Kc A   | 11878        | 11878              | 11878              | 11878              |
