# Supplementary material for: Expansion of GA Dinucleotide Repeats Increases the Density of CLAMP Binding Sites on the X-Chromosome to Promote Drosophila Dosage Compensation
Source: PubMed Central journal article supplement (PMC4945028; doi:10.1371/journal.pgen.1006120), 2016-07-14
Supplement: pgen.1006120.s026.pdf [file pgen.1006120.s026.pdf]

**Table S12.** Kolmogorov–Smirnov test was applied to the normalized distance values between S2 CLAMP CHIP-seq peaks.

|                    |     | 1st neighbor |               |               | up to 2nd neighbor |               |               | up to 3rd neighbor |               |               | up to 4th neighbor |               |   |
|--------------------|-----|--------------|---------------|---------------|--------------------|---------------|---------------|--------------------|---------------|---------------|--------------------|---------------|---|
|                    |     | CES          | X             | A             | CES                | X             | A             | CES                | X             | A             | CES                | X             | A |
| 1st neighbor       | CES |              |               |               |                    |               |               |                    |               |               |                    |               |   |
|                    | X   | 2.88<br>e-03 |               |               |                    |               |               |                    |               |               |                    |               |   |
|                    | A   | 1.16<br>e-02 | 1.43<br>e-05  |               |                    |               |               |                    |               |               |                    |               |   |
| up to 2nd neighbor | CES | 1.84<br>e-06 | 4.46<br>e-14  | < 2.2<br>e-16 |                    |               |               |                    |               |               |                    |               |   |
|                    | X   | 3.73<br>e-04 | < 2.2<br>e-16 | < 2.2<br>e-16 | 3.17<br>e-06       |               |               |                    |               |               |                    |               |   |
|                    | A   | 8.24<br>e-04 | < 2.2<br>e-16 | < 2.2<br>e-16 | 1.11<br>e-15       | 9.42<br>e-08  |               |                    |               |               |                    |               |   |
| up to 3rd neighbor | CES | 1.51<br>e-08 | < 2.2<br>e-16 | < 2.2<br>e-16 | 3.70<br>e-02       | 2.83<br>e-11  | < 2.2<br>e-16 |                    |               |               |                    |               |   |
|                    | X   | 6.55<br>e-09 | < 2.2<br>e-16 | < 2.2<br>e-16 | 5.61<br>e-07       | 4.81<br>e-07  | 1.05<br>e-12  | 9.82<br>e-12       |               |               |                    |               |   |
|                    | A   | 4.32<br>e-09 | < 2.2<br>e-16 | < 2.2<br>e-16 | < 2.2<br>e-16      | < 2.2<br>e-16 | < 2.2<br>e-16 | < 2.2<br>e-16      | 1.98<br>e-12  |               |                    |               |   |
| up to 4th neighbor | CES | 9.38<br>e-12 | < 2.2<br>e-16 | < 2.2<br>e-16 | 3.46<br>e-05       | 5.55<br>e-16  | < 2.2<br>e-16 | 8.17<br>e-02       | 1.48<br>e-13  | < 2.2<br>e-16 |                    |               |   |
|                    | X   | 1.50<br>e-13 | < 2.2<br>e-16 | < 2.2<br>e-16 | 7.30<br>e-07       | < 2.2<br>e-16 | < 2.2<br>e-16 | 2.74<br>e-12       | 9.35<br>e-04  | 9.99<br>e-16  | 6.10<br>e-13       |               |   |
|                    | A   | 7.49<br>e-13 | < 2.2<br>e-16 | < 2.2<br>e-16 | < 2.2<br>e-16      | < 2.2<br>e-16 | < 2.2<br>e-16 | < 2.2<br>e-16      | < 2.2<br>e-16 | 2.07<br>e-09  | < 2.2<br>e-16      | < 2.2<br>e-16 |   |
