# Supplementary material for: Expansion of GA Dinucleotide Repeats Increases the Density of CLAMP Binding Sites on the X-Chromosome to Promote Drosophila Dosage Compensation
Source: PubMed Central journal article supplement (PMC4945028; doi:10.1371/journal.pgen.1006120), 2016-07-14
Supplement: pgen.1006120.s027.pdf [file pgen.1006120.s027.pdf]

**Table S13.** Kolmogorov–Smirnov test was applied to the normalized distance values between Kc CLAMP CHIP-seq peaks.

|                    |     | 1st neighbor |               |               | up to 2nd neighbor |               |               | up to 3rd neighbor |               |               | up to 4th neighbor |              |   |
|--------------------|-----|--------------|---------------|---------------|--------------------|---------------|---------------|--------------------|---------------|---------------|--------------------|--------------|---|
|                    |     | CES          | X             | A             | CES                | X             | A             | CES                | X             | A             | CES                | X            | A |
| 1st neighbor       | CES |              |               |               |                    |               |               |                    |               |               |                    |              |   |
|                    | X   | 1.82<br>e-01 |               |               |                    |               |               |                    |               |               |                    |              |   |
|                    | A   | 1.27<br>e-01 | 1.21<br>e-04  |               |                    |               |               |                    |               |               |                    |              |   |
| up to 2nd neighbor | CES | 1.36<br>e-07 | 4.55<br>e-15  | < 2.2<br>e-16 |                    |               |               |                    |               |               |                    |              |   |
|                    | X   | 3.01<br>e-07 | < 2.2<br>e-16 | < 2.2<br>e-16 | 1.32<br>e-04       |               |               |                    |               |               |                    |              |   |
|                    | A   | 1.63<br>e-05 | < 2.2<br>e-16 | < 2.2<br>e-16 | 1.32<br>e-07       | 4.71<br>e-03  |               |                    |               |               |                    |              |   |
| up to 3rd neighbor | CES | 1.17<br>e-12 | < 2.2<br>e-16 | < 2.2<br>e-16 | 6.09<br>e-02       | 6.93<br>e-13  | < 2.2<br>e-16 |                    |               |               |                    |              |   |
|                    | X   | 1.23<br>e-12 | < 2.2<br>e-16 | < 2.2<br>e-16 | 2.59<br>e-04       | 5.45<br>e-09  | < 2.2<br>e-16 | 1.05<br>e-11       |               |               |                    |              |   |
|                    | A   | 1.74<br>e-10 | < 2.2<br>e-16 | < 2.2<br>e-16 | 9.64<br>e-08       | 1.31<br>e-13  | < 2.2<br>e-16 | < 2.2<br>e-16      | 1.16<br>e-05  |               |                    |              |   |
| up to 4th neighbor | CES | 2.83<br>e-14 | < 2.2<br>e-16 | < 2.2<br>e-16 | 9.97<br>e-03       | < 2.2<br>e-16 | < 2.2<br>e-16 | 4.34<br>e-01       | < 2.2<br>e-16 | < 2.2<br>e-16 |                    |              |   |
|                    | X   | 4.44<br>e-16 | < 2.2<br>e-16 | < 2.2<br>e-16 | 8.03<br>e-05       | < 2.2<br>e-16 | < 2.2<br>e-16 | 6.49<br>e-11       | 1.07<br>e-04  | 3.70<br>e-11  | 3.33<br>e-16       |              |   |
|                    | A   | 5.37<br>e-14 | < 2.2<br>e-16 | < 2.2<br>e-16 | 3.38<br>e-09       | < 2.2<br>e-16 | < 2.2<br>e-16 | < 2.2<br>e-16      | 2.43<br>e-11  | 1.32<br>e-08  | < 2.2<br>e-16      | 9.11<br>e-09 |   |
