# Supplementary material for: Expansion of GA Dinucleotide Repeats Increases the Density of CLAMP Binding Sites on the X-Chromosome to Promote Drosophila Dosage Compensation
Source: PubMed Central journal article supplement (PMC4945028; doi:10.1371/journal.pgen.1006120), 2016-07-14
Supplement: pgen.1006120.s028.pdf [file pgen.1006120.s028.pdf]

**Table S14.** Conservation of CLAMP across species .

| <b>Species</b>         | <b>FL %<br/>Identity</b> | <b>FL %<br/>Similarity</b> | <b>DBD %<br/>Identity</b> | <b>DBD %<br/>Similarity</b> |
|------------------------|--------------------------|----------------------------|---------------------------|-----------------------------|
| <i>D. melanogaster</i> | 100.0                    | 100.0                      | 100.0                     | 100.0                       |
| <i>D. miranda</i>      | 92.6                     | 95.9                       | 99.4                      | 100.0                       |
| <i>A. gambiae</i>      | 50.5                     | 59.0                       | 89.0                      | 93.9                        |

Conservation of CLAMP relative to *D. melanogaster* was determined for both the full-length protein (FL) and the DNA binding domain (DBD) alone.
