# Supplementary material for: Expansion of GA Dinucleotide Repeats Increases the Density of CLAMP Binding Sites on the X-Chromosome to Promote Drosophila Dosage Compensation
Source: PubMed Central journal article supplement (PMC4945028; doi:10.1371/journal.pgen.1006120), 2016-07-14
Supplement: pgen.1006120.s029.pdf [file pgen.1006120.s029.pdf]

**Table S15.** Number of matches to the CLAMP PBM motif per Mb on individual chromosomal arms.

| <i>D. melanogaster</i> |       | <i>D. miranda</i> |       | <i>A. gambiae</i> |       |
|------------------------|-------|-------------------|-------|-------------------|-------|
| chr2L                  | 91.6  | chr2              | 387.5 | chr2L             | 409.7 |
| chr2R                  | 88.2  | chr4              | 507.3 | chr2R             | 416.5 |
| chr3L                  | 90.6  | chr5              | 136.0 | chr3L             | 334.1 |
| chr3R                  | 91.4  | neoX              | 478.0 | chr3R             | 372.3 |
| chr4                   | 11.9  | chrXL             | 645.4 | chrX              | 870.0 |
| chrX                   | 202.8 | chrXR             | 729.0 |                   |       |
