# Supplementary material for: Expansion of GA Dinucleotide Repeats Increases the Density of CLAMP Binding Sites on the X-Chromosome to Promote Drosophila Dosage Compensation
Source: PubMed Central journal article supplement (PMC4945028; doi:10.1371/journal.pgen.1006120), 2016-07-14
Supplement: pgen.1006120.s030.pdf [file pgen.1006120.s030.pdf]

**Table S16.** Number of GA repeats in *D. miranda* chromosomes. Repeats may be overlapping.

|              | <b>XL</b> | <b>XR</b> | <b>3</b> | <b>A (2,4,5)</b> | <b>2</b> | <b>4</b> | <b>5</b> |
|--------------|-----------|-----------|----------|------------------|----------|----------|----------|
| <b>GA*2</b>  | 92978     | 130682    | 83961    | 252853           | 130383   | 117364   | 5106     |
| <b>GA*3</b>  | 13816     | 20057     | 10967    | 34014            | 17372    | 16151    | 491      |
| <b>GA*4</b>  | 4819      | 7111      | 3574     | 10618            | 5407     | 5058     | 153      |
| <b>GA*5</b>  | 2475      | 3674      | 1753     | 5126             | 2663     | 2439     | 24       |
| <b>GA*6</b>  | 1637      | 2416      | 1147     | 3207             | 1645     | 1542     | 20       |
| <b>GA*7</b>  | 1104      | 1657      | 809      | 2083             | 1049     | 1023     | 11       |
| <b>GA*8</b>  | 749       | 1138      | 564      | 1378             | 681      | 689      | 8        |
| <b>GA*9</b>  | 519       | 792       | 405      | 917              | 443      | 467      | 7        |
| <b>GA*10</b> | 379       | 562       | 272      | 648              | 301      | 342      | 5        |
| <b>GA*11</b> | 265       | 415       | 183      | 458              | 210      | 243      | 5        |
| <b>GA*12</b> | 193       | 286       | 130      | 344              | 151      | 188      | 5        |
| <b>GA*13</b> | 137       | 218       | 92       | 244              | 102      | 138      | 4        |
| <b>GA*14</b> | 94        | 160       | 64       | 178              | 68       | 107      | 3        |
| <b>GA*15</b> | 66        | 111       | 46       | 129              | 50       | 76       | 3        |
| <b>GA*16</b> | 51        | 81        | 37       | 98               | 38       | 57       | 3        |
| <b>GA*17</b> | 40        | 67        | 28       | 76               | 28       | 46       | 2        |
| <b>GA*18</b> | 29        | 48        | 22       | 56               | 22       | 32       | 2        |
| <b>GA*19</b> | 23        | 40        | 13       | 35               | 11       | 23       | 1        |
| <b>GA*20</b> | 18        | 32        | 9        | 29               | 8        | 21       | 0        |
| <b>GA*21</b> | 16        | 26        | 8        | 24               | 7        | 17       | 0        |
| <b>GA*22</b> | 15        | 24        | 5        | 21               | 7        | 14       | 0        |
| <b>GA*23</b> | 12        | 18        | 3        | 17               | 7        | 10       | 0        |
| <b>GA*24</b> | 10        | 17        | 3        | 15               | 6        | 9        | 0        |
| <b>GA*25</b> | 9         | 15        | 2        | 13               | 5        | 8        | 0        |
| <b>GA*26</b> | 8         | 12        | 2        | 11               | 4        | 7        | 0        |
| <b>GA*27</b> | 6         | 12        | 2        | 7                | 1        | 6        | 0        |
| <b>GA*28</b> | 5         | 9         | 1        | 7                | 1        | 6        | 0        |
