# Supplementary material for: Expansion of GA Dinucleotide Repeats Increases the Density of CLAMP Binding Sites on the X-Chromosome to Promote Drosophila Dosage Compensation
Source: PubMed Central journal article supplement (PMC4945028; doi:10.1371/journal.pgen.1006120), 2016-07-14
Supplement: pgen.1006120.s031.pdf [file pgen.1006120.s031.pdf]

**Table S17** Number of GA repeats in *A. gambiae* chromosomes. Repeats may be overlapping.

|              | <b>X</b> | <b>A</b> | <b>2L</b> | <b>2R</b> | <b>3L</b> | <b>3R</b> |
|--------------|----------|----------|-----------|-----------|-----------|-----------|
| <b>GA*2</b>  | 87061    | 655817   | 159887    | 192336    | 132715    | 170879    |
| <b>GA*3</b>  | 14166    | 79426    | 19639     | 23604     | 15466     | 20717     |
| <b>GA*4</b>  | 6356     | 26736    | 6686      | 8331      | 4955      | 6764      |
| <b>GA*5</b>  | 4097     | 15820    | 3991      | 4979      | 2843      | 4007      |
| <b>GA*6</b>  | 3034     | 10851    | 2749      | 3488      | 1928      | 2686      |
| <b>GA*7</b>  | 2273     | 7687     | 1954      | 2514      | 1341      | 1878      |
| <b>GA*8</b>  | 1732     | 5522     | 1397      | 1835      | 982       | 1308      |
| <b>GA*9</b>  | 1343     | 4048     | 1024      | 1360      | 707       | 957       |
| <b>GA*10</b> | 1063     | 3110     | 790       | 1036      | 539       | 745       |
| <b>GA*11</b> | 867      | 2498     | 637       | 841       | 420       | 600       |
| <b>GA*12</b> | 731      | 2102     | 534       | 705       | 357       | 506       |
| <b>GA*13</b> | 616      | 1808     | 451       | 612       | 304       | 441       |
| <b>GA*14</b> | 522      | 1554     | 381       | 526       | 272       | 375       |
| <b>GA*15</b> | 458      | 1355     | 329       | 456       | 247       | 323       |
| <b>GA*16</b> | 404      | 1182     | 286       | 400       | 217       | 279       |
| <b>GA*17</b> | 352      | 1055     | 264       | 355       | 194       | 242       |
| <b>GA*18</b> | 315      | 921      | 230       | 310       | 168       | 213       |
| <b>GA*19</b> | 270      | 804      | 207       | 267       | 141       | 189       |
| <b>GA*20</b> | 233      | 687      | 179       | 228       | 113       | 167       |
| <b>GA*21</b> | 196      | 594      | 160       | 192       | 102       | 140       |
| <b>GA*22</b> | 168      | 514      | 133       | 171       | 93        | 117       |
| <b>GA*23</b> | 146      | 450      | 116       | 149       | 82        | 103       |
| <b>GA*24</b> | 131      | 399      | 104       | 127       | 75        | 93        |
| <b>GA*25</b> | 117      | 344      | 88        | 110       | 65        | 81        |
| <b>GA*26</b> | 96       | 304      | 76        | 96        | 55        | 77        |
| <b>GA*27</b> | 89       | 258      | 62        | 78        | 52        | 66        |
| <b>GA*28</b> | 74       | 228      | 53        | 68        | 48        | 59        |
