# Supplementary material for: Expansion of GA Dinucleotide Repeats Increases the Density of CLAMP Binding Sites on the X-Chromosome to Promote Drosophila Dosage Compensation
Source: PLoS Genet. 2016 Jul 14;12(7):e1006120. doi: 10.1371/journal.pgen.1006120 (PMC4945028; doi:10.1371/journal.pgen.1006120)
Supplement: S9 Table — (PDF) [file pgen.1006120.s023.pdf]

**Table S9.** Kolmogorov–Smirnov test was applied to the average distance values between S2 CLAMP ChIP-seq peaks.

[illegible]
